# Supplementary material for: Differential expression of lipoprotein genes in Mycoplasma pneumoniae after contact with human lung epithelial cells, and under oxidative and acidic stress
Source: Springer Nature journal article supplement (doi:10.1186/1471-2180-8-124), 2008-01-01
Supplement: Additional file 1 [file 1471-2180-8-124-s1.pdf]

**Additional File 1. Change in lipoprotein gene expression in *M. pneumoniae* after binding to A549 cells.**

| Lipoprotein gene family | Gene annotation (NCBI) | Change in lipoprotein gene expression (fold)* after binding to A549 cells for: |                |        |                |     |                |
|-------------------------|------------------------|--------------------------------------------------------------------------------|----------------|--------|----------------|-----|----------------|
|                         |                        | 15 min                                                                         | <i>P</i> value | 30 min | <i>P</i> value | 1 h | <i>P</i> value |
| 1                       | MPN084                 | 1.8                                                                            | 0.308          | 1.6    | 0.293          | 2.1 | 0.413          |
|                         | MPN591                 | 1.5                                                                            | 0.505          | 1.9    | 0.255          | 1.8 | 0.568          |
|                         | MPN592                 | 1.2                                                                            | 0.822          | 1.4    | 0.593          | 1.2 | 0.901          |
|                         | MPN083                 | 1.9                                                                            | 0.306          | 2.3    | 0.143          | 1.6 | 0.691          |
|                         | MPN588                 | 1.9                                                                            | 0.294          | 1.9    | 0.236          | 1.8 | 0.568          |
|                         | MPN582                 | 1.5                                                                            | 0.540          | 1.8    | 0.348          | 2   | 0.436          |
|                         |                        |                                                                                |                |        |                |     |                |
| 2                       | MPN199                 | 2.1                                                                            | 0.129          | 2.6    | 0.166          | 2.5 | 0.221          |
|                         | MPN408                 | 1.6                                                                            | 0.429          | 1.3    | 0.607          | 1   | 0.979          |
|                         | MPN200                 | 1.9                                                                            | 0.219          | 2.4    | 0.191          | 3.2 | 0.069          |
|                         | MPN152                 | 1.5                                                                            | 0.487          | 2.1    | 0.445          | 1.7 | 0.603          |
|                         |                        |                                                                                |                |        |                |     |                |
| 3                       | MPN436                 | 1.4                                                                            | 0.706          | 1      | 0.972          | 1.7 | 0.528          |
|                         | MPN444                 | 2                                                                              | 0.299          | 1.4    | 0.572          | 1.3 | 0.858          |
|                         | MPN489                 | 2                                                                              | 0.323          | 1.5    | 0.586          | 1.4 | 0.760          |
|                         |                        |                                                                                |                |        |                |     |                |
| 4                       | MPN456                 | 1.5                                                                            | 0.5            | 2.2    | 0.181          | 2.4 | 0.228          |
|                         |                        |                                                                                |                |        |                |     |                |
| 5                       | MPN011                 | 2.2                                                                            | 0.149          | 2.1    | 0.115          | 2.2 | 0.314          |
|                         | MPN012                 | 1.6                                                                            | 0.438          | 1.7    | 0.206          | 2   | 0.504          |
|                         | MPN411                 | 2.3                                                                            | 0.205          | 2      | 0.2            | 2.5 | 0.171          |
|                         | MPN271                 | 1.9                                                                            | 0.295          | 1.9    | 0.121          | 2.2 | 0.362          |
|                         | MPN505                 | 1                                                                              | 0.997          | 1.2    | 0.655          | 0.9 | 0.925          |
|                         |                        |                                                                                |                |        |                |     |                |
| 6                       | MPN647                 | 1.4                                                                            | 0.655          | 1.3    | 0.521          | 1.6 | 0.784          |
|                         | MPN646                 | 1.1                                                                            | 0.897          | 1.2    | 0.790          | 1.3 | 0.822          |
|                         | MPN645                 | 1.8                                                                            | 0.445          | 1.8    | 0.215          | 2.3 | 0.355          |
|                         | MPN644                 | 1.2                                                                            | 0.826          | 0.9    | 0.821          | 1.3 | 0.912          |
|                         | MPN643                 | 1.6                                                                            | 0.525          | 1.8    | 0.320          | 2.2 | 0.382          |
|                         | MPN642                 | 1.5                                                                            | 0.564          | 1.4    | 0.571          | 1.5 | 0.808          |
|                         | MPN641                 | 2                                                                              | 0.363          | 2      | 0.332          | 2.4 | 0.057          |
|                         | MPN640                 | 1.2                                                                            | 0.827          | 1.1    | 0.837          | 1.3 | 0.826          |
|                         | MPN639                 | 1.5                                                                            | 0.614          | 1.3    | 0.720          | 1.3 | 0.892          |

\* Mean of three independent experiments, each containing three biological replicates
